# Supplementary material
Source: HighWire-hosted journal article supplement (https://bmjopen.bmj.com/highwire/filestream/94502/field_highwire_adjunct_files/0/bjsports-2015-h2747repsupp.pdf)
Supplement: bjsports-2015-h2747repsupp.pdf [file bjsports-2015-h2747repsupp.pdf]

### Supplementary File 1. National data on age, primiparity and education

| <b>Publisher</b>                                                      | <b>Publication</b>                                                                                                          | <b>Source</b>                                                                                                                                                                     |
|-----------------------------------------------------------------------|-----------------------------------------------------------------------------------------------------------------------------|-----------------------------------------------------------------------------------------------------------------------------------------------------------------------------------|
| Australian Bureau of Statistics                                       | Births, Australia 2011                                                                                                      | <a href="http://www.abs.gov.au/AUSSTATS/abs@.nsf/mf/3301.0">http://www.abs.gov.au/AUSSTATS/abs@.nsf/mf/3301.0</a>                                                                 |
| Australian Bureau of Statistics                                       | Australian Social Trends, Sep 2012.                                                                                         | <a href="http://www.abs.gov.au/AUSSTATS/abs@.nsf/Lookup/4102.0&gt;Main+Features20Sep+2012">http://www.abs.gov.au/AUSSTATS/abs@.nsf/Lookup/4102.0<br/>Main+Features20Sep+2012</a>  |
| Croatian Bureau of Statistics                                         | Statistical Yearbook of the Republic of Croatia. Zagreb, 2011                                                               | <a href="http://www.dzs.hr/Hrv_Eng/ljetopis/2011/SLJH2011.pdf">http://www.dzs.hr/Hrv_Eng/ljetopis/2011/SLJH2011.pdf</a>                                                           |
| Donati S, Baglio G, Spinelli A, et al                                 | Drug use in pregnancy among Italian women                                                                                   | Eur J Clin Pharmacol 2000;56:323-328                                                                                                                                              |
| Eurostat                                                              | Live births by mother's age at last birthday and legal marital status                                                       | <a href="http://appsso.eurostat.ec.europa.eu/nui/show.do?dataset=demo_fagec&amp;lang=en">http://appsso.eurostat.ec.europa.eu/nui/show.do?dataset=demo_fagec&amp;lang=en</a>       |
| Eurostat                                                              | Persons with a given education attainment level by sex and age groups (%)                                                   | <a href="http://appsso.eurostat.ec.europa.eu/nui/show.do?dataset=edat_lfs_9903&amp;lang=en">http://appsso.eurostat.ec.europa.eu/nui/show.do?dataset=edat_lfs_9903&amp;lang=en</a> |
| Federal State Statistics Service (Rosstat)                            | The Demographic Yearbook of Russia - statistical handbook. Moscow, 2010                                                     | <a href="http://www.gks.ru/wps/wcm/connect/rosstat_main/rosstat/en/main/">http://www.gks.ru/wps/wcm/connect/rosstat_main/rosstat/en/main/</a>                                     |
| Istat (Istituto nazionale di statistica)                              | Demography in figures                                                                                                       | <a href="http://demo.istat.it/index_e.html">http://demo.istat.it/index_e.html</a>                                                                                                 |
| Krstev S, Marinković J, Simić S, Kocev N, Bondy SJ.                   | Prevalence and predictors of smoking and quitting during pregnancy in Serbia: results of a nationally representative survey | Int J Publ Health 2012; 57:875-883                                                                                                                                                |
| National Institute for Health and Welfare                             | Nordic Perinatal Statistics 2010                                                                                            | <a href="http://www.thl.fi/tilastoliite/tilastoraportit/2012/Tr07_12.pdf">http://www.thl.fi/tilastoliite/tilastoraportit/2012/Tr07_12.pdf</a>                                     |
| National Institute of Statistics and Economic Studies (INSEE, France) | Population                                                                                                                  | <a href="http://www.insee.fr/en/themes/theme.asp?theme=2">http://www.insee.fr/en/themes/theme.asp?theme=2</a>                                                                     |
| Norwegian Institute of Public Health                                  | Medisinsk fødselsregisters statistikkbank - statistikk om alle fødsler i Norge                                              | <a href="http://mfr-nesstar.uib.no/mfr/">http://mfr-nesstar.uib.no/mfr/</a>                                                                                                       |
| Public Health Agency of Canada                                        | Canadian Perinatal Health Report, 2008 Edition. Ottawa, 2008                                                                | <a href="http://www.phac-aspc.gc.ca/publicat/2008/cphr-rspc/index-eng.php">http://www.phac-aspc.gc.ca/publicat/2008/cphr-rspc/index-eng.php</a>                                   |

|                                                       |                                                                                                                                                                                                                                |                                                                                                                                                                                                 |
|-------------------------------------------------------|--------------------------------------------------------------------------------------------------------------------------------------------------------------------------------------------------------------------------------|-------------------------------------------------------------------------------------------------------------------------------------------------------------------------------------------------|
| STATcube - Statistical Database of Statistics Austria | Statistics – Population – Births                                                                                                                                                                                               | <a href="http://statcube.at/superweb/login.do?guest=guest">http://statcube.at/superweb/login.do?guest=guest</a>                                                                                 |
| Statistics Austria                                    | Births. Long-term and current final annual results.                                                                                                                                                                            | <a href="http://www.statistik.at/web_en/statistics/population/births/index.html">http://www.statistik.at/web_en/statistics/population/births/index.html</a>                                     |
| Statistics Canada                                     | Births                                                                                                                                                                                                                         | <a href="http://www.statcan.gc.ca/daily-quotidien/111220/dq111220g-eng.htm">http://www.statcan.gc.ca/daily-quotidien/111220/dq111220g-eng.htm</a>                                               |
| Statistics Iceland                                    | Population: Births and Deaths                                                                                                                                                                                                  | <a href="http://www.statice.is/Statistics/Population/Births-and-deaths">http://www.statice.is/Statistics/Population/Births-and-deaths</a>                                                       |
| Statistics Netherlands (Statline)                     | Population/Births and deaths                                                                                                                                                                                                   | <a href="http://www.cbs.nl/en-GB/menu/themas/bevolking/nieuws/default.htm">http://www.cbs.nl/en-GB/menu/themas/bevolking/nieuws/default.htm</a>                                                 |
| Statistical Office of the Republic of Slovenia        | SI-STAT Data Portal: Population.                                                                                                                                                                                               | <a href="http://pxweb.stat.si/pxweb/Database/Demographics/Demographics.asp">http://pxweb.stat.si/pxweb/Database/Demographics/Demographics.asp</a>                                               |
| Statistical office of the Republic of Serbia          | Statistical Yearbook of the Republic of Serbia. Demographic Yearbook in Republic of Serbia. Belgrade: Statistical Office of the Republic of Serbia, 2011                                                                       | <a href="http://webrzs.stat.gov.rs/WebSite/Default.aspx">http://webrzs.stat.gov.rs/WebSite/Default.aspx</a>                                                                                     |
| Swiss Statistics                                      | Components of population change – Data, indicators                                                                                                                                                                             | <a href="http://www.bfs.admin.ch/bfs/portal/en/index/themen/01/06/blank/key/01.html">http://www.bfs.admin.ch/bfs/portal/en/index/themen/01/06/blank/key/01.html</a>                             |
| UK National Statistics                                | Characteristics of Birth 1 and 2, England and Wales<br><br>Characteristics of Mother 1, England and Wales                                                                                                                      | <a href="http://www.statistics.gov.uk/hub/population/births-and-fertility/maternities/index.html">http://www.statistics.gov.uk/hub/population/births-and-fertility/maternities/index.html</a>   |
| United States Census Bureau                           | The National Data Book. The 2012 Statistical Abstract. Births, deaths, marriages & divorces: Births. 94 - Women with births in the past 12 months by citizenship status, educational attainment, and poverty status, by state. | <a href="http://www.census.gov/compendia/statab/cats/births_deaths_marriages_divorces/births.html">http://www.census.gov/compendia/statab/cats/births_deaths_marriages_divorces/births.html</a> |
